# Supplementary material for: Dipolar guest orientation in polymer co-crystals and macroscopic films
Source: Royal Society of Chemistry journal article supplement (doi:10.1039/b904675p), 2009-01-01
Supplement: b904675p.pdf [file b904675p.pdf]

# Dipolar Guest Orientation in Polymer Co-crystals and Macroscopic Films

Oreste Tarallo,\* Vittorio Petraccone, Christophe Daniel,\* Gaetano Guerra

*Received (in XXX, XXX) Xth XXXXXXXXXX 200X, Accepted Xth XXXXXXXXXX 200X*

*<sup>s</sup> First published on the web Xth XXXXXXXXXX 200X*

DOI: 10.1039/b000000x

**Electronic Supplementary Information:** Tables containing the fractional coordinates of the models presented in the manuscript and the structure factors (calculated and observed).

**Table 1.** Fractional coordinates of the atoms of the asymmetric unit of the model presented in Figure 4 of the manuscript for the s-PS/NB  $\delta$  clathrate form according to the space group  $P2_1/a$ . Hydrogen atoms were included in the structure factors calculation, but they are omitted in this Table for simplicity.

| s-PS/NB |        |        |       |
|---------|--------|--------|-------|
|         | x/a    | y/b    | z/c   |
| C1      | 0.251  | -0.004 | 0.507 |
| C2      | 0.273  | -0.075 | 0.634 |
| C3      | 0.160  | -0.001 | 0.255 |
| C4      | 0.175  | -0.079 | 0.379 |
| C5      | 0.090  | -0.163 | 0.472 |
| C6      | 0.049  | -0.120 | 0.575 |
| C7      | -0.031 | -0.198 | 0.655 |
| C8      | -0.071 | -0.321 | 0.632 |
| C9      | -0.031 | -0.365 | 0.531 |
| C10     | 0.049  | -0.286 | 0.452 |
| C11     | 0.297  | -0.153 | 0.534 |
| C12     | 0.366  | -0.105 | 0.419 |
| C13     | 0.386  | -0.178 | 0.326 |
| C14     | 0.337  | -0.302 | 0.349 |
| C15     | 0.268  | -0.351 | 0.467 |
| C16     | 0.249  | -0.276 | 0.558 |
| C17     | 0.412  | 0.503  | 0.522 |
| C18     | 0.519  | 0.409  | 0.512 |
| C19     | 0.375  | 0.379  | 0.523 |
| C20     | 0.557  | 0.533  | 0.511 |
| C21     | 0.428  | 0.333  | 0.517 |
| C22     | 0.503  | 0.581  | 0.516 |
| N1      | 0.651  | 0.612  | 0.506 |
| O1      | 0.695  | 0.566  | 0.506 |
| O2      | 0.682  | 0.718  | 0.504 |

**Table 2.** Structure factors calculated ( $F_{\text{calcd}}$ ) according to the space group  $P2_1/a$  imposing an occupancy factor for the guest molecules of 0.9, for the model of the  $\delta$  co-crystalline form of s-PS with nitrobenzene reported in Figure 4 of the manuscript. Observed structure factors ( $F_{\text{obsd}}$ ), as evaluated from the intensities of the reflections of the X-ray fiber diffraction pattern of Figure 2 (A). The Bragg distances ( $d_{\text{obsd}}$ ), observed in the X-ray fiber diffraction pattern and calculated ( $d_{\text{calcd}}$ ) for the proposed monoclinic unit cell ( $a = 1.80$  nm,  $b = 1.32$  nm,  $c = 0.78$  nm and  $\gamma = 107.8^\circ$ ), are also shown. Reflections not observed with  $F_{\text{calcd}}$  less than 25 have not been reported.

| hkl                                                                                                    | $d_{\text{calcd}}$ (nm) | $d_{\text{obsd}}$ (nm) | $F_{\text{calcd}}$                                                     | $F_{\text{obsd}}$ |     |
|--------------------------------------------------------------------------------------------------------|-------------------------|------------------------|------------------------------------------------------------------------|-------------------|-----|
| 010                                                                                                    | 1.12                    | 1.12                   | 45                                                                     | 57                |     |
| $2\bar{1}0$                                                                                            | 0.89                    | 0.86                   | 57                                                                     | 83                |     |
| 200                                                                                                    | 0.76                    | -                      | 27                                                                     | -                 |     |
| $2\bar{2}0$                                                                                            | 0.64                    | -                      | 27                                                                     | -                 |     |
| 020                                                                                                    | 0.56                    | 0.56                   | 16                                                                     | 22                |     |
| 210                                                                                                    | 0.52                    | 0.51                   | 74                                                                     | 58                |     |
| $\left\{ \begin{array}{l} \bar{4}20 \\ 2\bar{3}0 \\ 4\bar{1}0 \end{array} \right\}$                    | 0.44                    | 0.44                   | $\left\{ \begin{array}{l} 41 \\ 66 \\ 25 \end{array} \right\}$         | 82                | 79  |
| $\left\{ \begin{array}{l} \bar{4}30 \\ 400 \\ 030 \\ 220 \end{array} \right\}$                         | 0.39                    | 0.38                   | $\left\{ \begin{array}{l} 37 \\ 19 \\ 48 \\ 42 \end{array} \right\}$   | 76                | 71  |
| $2\bar{4}0$                                                                                            | 0.32                    | -                      | 26                                                                     | 22                |     |
| 040                                                                                                    | 0.28                    | 0.29                   | 38                                                                     | 20                |     |
| $\bar{6}40$                                                                                            | 0.27                    | -                      | 27                                                                     | -                 |     |
| $\bar{4}50$                                                                                            | 0.26                    | 0.26                   | 24                                                                     | -                 |     |
| $\left\{ \begin{array}{l} 1\bar{1}1 \\ 011 \end{array} \right\}$                                       | 0.67                    | 0.66                   | $\left\{ \begin{array}{l} 24 \\ 2 \end{array} \right\}$                | 24                | 31  |
| $\left\{ \begin{array}{l} 201 \\ 111 \\ \bar{1}21 \\ 2\bar{2}1 \end{array} \right\}$                   | 0.55                    | 0.52                   | $\left\{ \begin{array}{l} 18 \\ 103 \\ 112 \\ 34 \end{array} \right\}$ | 157               | 177 |
| $3\bar{1}1$                                                                                            | 0.47                    | -                      | 25                                                                     | -                 |     |
| $\left\{ \begin{array}{l} 021 \\ 3\bar{2}1 \\ 211 \\ 301 \end{array} \right\}$                         | 0.46                    | 0.44                   | $\left\{ \begin{array}{l} 3 \\ 106 \\ 28 \\ 94 \end{array} \right\}$   | 144               | 152 |
| $\left\{ \begin{array}{l} \bar{4}21 \\ 2\bar{3}1 \\ 4\bar{1}1 \\ \bar{3}\bar{3}1 \end{array} \right\}$ | 0.39                    | 0.38                   | $\left\{ \begin{array}{l} 89 \\ 28 \\ 94 \\ 15 \end{array} \right\}$   | 133               | 97  |
| 311                                                                                                    | 0.35                    | -                      | 26                                                                     | -                 |     |
| $\bar{1}41$                                                                                            | 0.28                    | -                      | 28                                                                     | -                 |     |
| 501                                                                                                    | 0.28                    | -                      | 26                                                                     | -                 |     |
| $\bar{6}41$                                                                                            | 0.26                    | -                      | 28                                                                     | -                 |     |

|                                                                                                    |                                                                                              |      |                                                                                 |     |     |
|----------------------------------------------------------------------------------------------------|----------------------------------------------------------------------------------------------|------|---------------------------------------------------------------------------------|-----|-----|
| $\left\{ \begin{array}{l} 102 \\ \bar{1}12 \\ 012 \\ 2\bar{1}2 \\ 202 \\ 112 \end{array} \right\}$ | $\left\{ \begin{array}{l} 0.38 \\ 0.37 \\ 0.37 \\ 0.36 \\ 0.35 \\ 0.34 \end{array} \right\}$ | 0.36 | $\left\{ \begin{array}{l} 32 \\ 50 \\ 59 \\ 72 \\ 5 \\ 38 \end{array} \right\}$ | 117 | 138 |
| $\bar{2}22$                                                                                        | 0.33                                                                                         | -    | 26                                                                              | -   | -   |
| $\left\{ \begin{array}{l} \bar{3}12 \\ 022 \\ \bar{3}22 \\ 212 \\ 302 \end{array} \right\}$        | $\left\{ \begin{array}{l} 0.33 \\ 0.32 \\ 0.32 \\ 0.31 \\ 0.31 \end{array} \right\}$         | 0.32 | $\left\{ \begin{array}{l} 12 \\ 1 \\ 59 \\ 23 \\ 61 \end{array} \right\}$       | 81  | 89  |
| $\bar{4}22$                                                                                        | 0.29                                                                                         | -    | 40                                                                              | -   | -   |
| $\left\{ \begin{array}{l} 312 \\ \bar{4}32 \\ 402 \\ 032 \end{array} \right\}$                     | $\left\{ \begin{array}{l} 0.28 \\ 0.28 \\ 0.27 \\ 0.27 \end{array} \right\}$                 | 0.27 | $\left\{ \begin{array}{l} 12 \\ 50 \\ 47 \\ 15 \end{array} \right\}$            | 72  | 51  |
| $\bar{5}12$                                                                                        | 0.26                                                                                         | -    | 25                                                                              | -   | -   |
| $\bar{5}32$                                                                                        | 0.26                                                                                         | -    | 32                                                                              | -   | -   |

**Table 3.** Fractional coordinates of the atoms of an asymmetric unit of the minimum energy model found for the  $\delta$  co-crystalline form s-PS/NA according the space group  $P2_1/a$ .

|     | s-PS/NA |        |       |
|-----|---------|--------|-------|
|     | $x/a$   | $y/b$  | $z/c$ |
| C1  | 0.243   | -0.007 | 0.501 |
| C2  | 0.039   | -0.302 | 0.451 |
| C3  | 0.297   | -0.151 | 0.519 |
| C4  | 0.366   | -0.096 | 0.401 |
| C5  | 0.390   | -0.166 | 0.308 |
| C6  | 0.344   | -0.294 | 0.332 |
| C7  | 0.275   | -0.350 | 0.451 |
| C8  | 0.252   | -0.278 | 0.543 |
| C9  | 0.270   | -0.076 | 0.623 |
| C10 | 0.153   | -0.010 | 0.242 |
| C11 | 0.168   | -0.088 | 0.371 |
| C12 | 0.082   | -0.173 | 0.464 |
| C13 | 0.041   | -0.127 | 0.561 |
| C14 | -0.040  | -0.205 | 0.642 |
| C15 | -0.082  | -0.333 | 0.626 |
| C16 | -0.042  | -0.382 | 0.531 |
| C17 | 0.563   | 0.457  | 0.482 |
| C18 | 0.470   | 0.573  | 0.502 |
| C19 | 0.610   | 0.587  | 0.490 |
| C20 | 0.424   | 0.443  | 0.493 |
| C21 | 0.562   | 0.644  | 0.501 |
| C22 | 0.471   | 0.385  | 0.484 |
| N1  | 0.703   | 0.659  | 0.485 |
| N2  | 0.328   | 0.370  | 0.492 |
| O1  | 0.291   | 0.426  | 0.497 |
| O2  | 0.291   | 0.259  | 0.484 |

5

10

15

20

30

25

**Table 4.** Fractional coordinates of the atoms of an asymmetric unit of the triclinic model of the Figure 7 of the manuscript (unit cell parameters:  $a = 1.795$  nm,  $b = 1.29$  nm,  $c = 0.78$  nm,  $\alpha = 98^\circ$ ,  $\beta = 90^\circ$  and  $\gamma = 122.3^\circ$ ) for the  $\delta$  co-crystalline form s-PS/NA according the space group  $\bar{P}1$ . Hydrogen atoms were included in the structure factors calculation, but they are omitted in this Table for simplicity

|     | s-PS/NA |        |       |
|-----|---------|--------|-------|
|     | $x/a$   | $y/b$  | $z/c$ |
| C1  | 0.247   | -0.278 | 0.481 |
| C2  | 0.287   | -0.345 | 0.380 |
| C3  | 0.395   | -0.159 | 0.276 |
| C4  | 0.366   | -0.093 | 0.379 |
| C5  | 0.356   | -0.286 | 0.276 |
| C6  | 0.044   | -0.296 | 0.415 |
| C7  | -0.032  | -0.374 | 0.490 |
| C8  | -0.074  | -0.324 | 0.589 |
| C9  | -0.038  | -0.196 | 0.613 |
| C10 | 0.039   | -0.120 | 0.536 |
| C11 | 0.081   | -0.168 | 0.435 |
| C12 | 0.165   | -0.086 | 0.351 |
| C13 | 0.342   | 0.006  | 0.743 |
| C14 | 0.266   | -0.079 | 0.600 |
| C15 | 0.296   | -0.151 | 0.483 |
| C16 | 0.242   | -0.006 | 0.494 |
| C17 | 0.578   | 0.338  | 1.180 |
| C18 | 0.224   | 0.076  | 1.136 |
| C19 | 0.148   | -0.009 | 0.241 |
| C20 | 0.536   | 0.210  | 1.180 |
| C21 | 0.324   | 0.083  | 0.887 |
| C22 | 0.411   | 0.172  | 0.998 |
| C23 | 0.453   | 0.299  | 1.003 |
| C24 | 0.122   | 0.093  | 0.932 |
| C25 | 0.098   | 0.163  | 0.852 |
| C26 | 0.151   | 0.292  | 0.886 |
| C27 | 0.226   | 0.351  | 1.003 |
| C28 | 0.249   | 0.003  | 0.999 |

|     |        |       |       |
|-----|--------|-------|-------|
| C29 | 0.453  | 0.129 | 1.089 |
| C30 | 0.536  | 0.382 | 1.093 |
| C31 | 0.197  | 0.150 | 1.048 |
| C32 | 0.249  | 0.280 | 1.082 |
| C33 | -0.033 | 0.568 | 0.964 |
| C34 | 0.599  | 0.500 | 0.542 |
| C35 | 0.634  | 0.611 | 0.474 |
| C36 | 0.576  | 0.647 | 0.429 |
| C37 | 0.509  | 0.426 | 0.562 |
| C38 | 0.486  | 0.574 | 0.449 |
| C39 | 0.082  | 0.499 | 1.060 |
| C40 | 0.115  | 0.604 | 0.978 |
| C41 | -0.064 | 0.464 | 1.047 |
| C42 | 0.452  | 0.462 | 0.514 |
| C43 | -0.006 | 0.429 | 1.093 |
| C44 | 0.055  | 0.636 | 0.930 |
| N1  | -0.156 | 0.394 | 1.087 |
| N2  | 0.358  | 0.387 | 0.535 |
| N3  | 0.204  | 0.675 | 0.949 |
| N4  | 0.724  | 0.683 | 0.451 |
| O1  | 0.311  | 0.419 | 0.484 |
| O2  | 0.332  | 0.295 | 0.602 |
| O3  | -0.180 | 0.303 | 1.154 |
| O4  | -0.202 | 0.433 | 1.054 |

**Table 5.** Structure factors calculated ( $F_{\text{calcd}}$ ) according the space group  $\bar{P}1$ , for the model of the  $\delta$  co-crystalline form of s-PS 4-nitroaniline presented in Figure 7 of the manuscript. Observed structure factors ( $F_{\text{obsd}}$ ), as evaluated from the intensities of the reflections of the X-ray fiber diffraction pattern of Figure 2(B). The Bragg distances ( $d_{\text{obsd}}$ ), observed in the X-ray fiber diffraction pattern and calculated ( $d_{\text{calcd}}$ ) for the proposed triclinic unit cell ( $a = 1.795$  nm,  $b = 1.29$  nm,  $c = 0.78$  nm,  $\alpha = 98^\circ$ ,  $\beta = 90^\circ$  and  $\gamma = 122.3^\circ$ ), are also shown. Reflections not observed with  $F_{\text{calcd}}$  less than 25 have not been reported.

| hkl                                                                                                                                                                                                            | $d_{\text{calcd}}$ (nm) | $d_{\text{obsd}}$ (nm)        | $F_{\text{calcd}}$                                                                                                         | $F_{\text{obsd}}$ |
|----------------------------------------------------------------------------------------------------------------------------------------------------------------------------------------------------------------|-------------------------|-------------------------------|----------------------------------------------------------------------------------------------------------------------------|-------------------|
| 010                                                                                                                                                                                                            | 1.08                    | 1.07                          | 41                                                                                                                         | 47                |
| $2\bar{1}0$                                                                                                                                                                                                    | 0.88                    | 0.87                          | 42                                                                                                                         | 50                |
| $\left\{ \begin{array}{l} \bar{3}20 \\ 020 \end{array} \right\}$                                                                                                                                               | 0.54                    | 0.54                          | $\left. \begin{array}{l} 2 \\ 9 \end{array} \right\}_{10}$                                                                 | 19                |
| $\left\{ \begin{array}{l} 300 \\ 210 \end{array} \right\}$                                                                                                                                                     | 0.50                    | 0.51                          | $\left. \begin{array}{l} 7 \\ 64 \end{array} \right\}_{64}$                                                                | 44                |
| $\left\{ \begin{array}{l} \bar{4}20 \\ 4\bar{1}0 \\ 120 \\ 2\bar{3}0 \end{array} \right\}$                                                                                                                     | 0.44                    | 0.44                          | $\left. \begin{array}{l} 32 \\ 16 \\ 4 \\ 63 \end{array} \right\}_{73}$                                                    | 65                |
| $\left\{ \begin{array}{l} 310 \\ \bar{4}30 \\ 400 \end{array} \right\}$                                                                                                                                        | 0.38                    | 0.39                          | $\left. \begin{array}{l} 2 \\ 27 \\ 13 \end{array} \right\}_{30}$                                                          | 34                |
| 030                                                                                                                                                                                                            | 0.36                    | -                             | 40                                                                                                                         | -                 |
| 220                                                                                                                                                                                                            | 0.36                    | -                             | 25                                                                                                                         | -                 |
| $\left\{ \begin{array}{l} 10\bar{1} \\ 1\bar{1}1 \\ 01\bar{1} \\ 101 \\ 1\bar{1}\bar{1} \end{array} \right\}$                                                                                                  | 0.71                    | 0.65                          | $\left. \begin{array}{l} 1 \\ 9 \\ 8 \\ 25 \\ 32 \end{array} \right\}_{42}$                                                | 53                |
| $\left\{ \begin{array}{l} 011 \\ 2\bar{1}\bar{1} \\ 11\bar{1} \\ 20\bar{1} \\ 1\bar{2}1 \\ 201 \\ 2\bar{2}1 \\ 111 \end{array} \right\}$                                                                       | 0.58                    | Broad:<br>centered at<br>0.53 | $\left. \begin{array}{l} 9 \\ 6 \\ 70 \\ 4 \\ 103 \\ 15 \\ 30 \\ 81 \end{array} \right\}_{153}$                            | 173               |
| $\left\{ \begin{array}{l} 3\bar{1}\bar{1} \\ 3\bar{1}1 \\ 2\bar{2}\bar{1} \\ 3\bar{2}1 \\ 1\bar{2}\bar{1} \\ 21\bar{1} \\ 30\bar{1} \\ 3\bar{2}\bar{1} \\ 02\bar{1} \\ 121 \\ 301 \\ 211 \end{array} \right\}$ | 0.47                    | Broad:<br>centered at<br>0.44 | $\left. \begin{array}{l} 24 \\ 48 \\ 33 \\ 77 \\ 101 \\ 25 \\ 85 \\ 70 \\ 17 \\ 26 \\ 71 \\ 23 \end{array} \right\}_{198}$ | 180               |

|                                                                                                                                                                                  |      |      |                                                                                                                     |     |
|----------------------------------------------------------------------------------------------------------------------------------------------------------------------------------|------|------|---------------------------------------------------------------------------------------------------------------------|-----|
| $\left\{ \begin{array}{l} \bar{4}21 \\ 4\bar{1}\bar{1} \\ 3\bar{3}1 \\ 1\bar{3}1 \\ \bar{4}2\bar{1} \\ 4\bar{1}1 \\ 31\bar{1} \end{array} \right\}$                              | 0.39 | 0.38 | $\left. \begin{array}{l} 79 \\ 84 \\ 7 \\ 14 \\ 52 \\ 59 \\ 5 \end{array} \right\}_{141}$                           | 128 |
| $3\bar{3}\bar{1}$                                                                                                                                                                | 0.35 | -    | 29                                                                                                                  | -   |
| $\left\{ \begin{array}{l} 102 \\ 11\bar{2} \\ 2\bar{1}2 \\ 1\bar{1}\bar{2} \\ 20\bar{2} \\ 1\bar{2}2 \\ 2\bar{1}\bar{2} \end{array} \right\}$                                    | 0.37 | 0.36 | $\left. \begin{array}{l} 51 \\ 40 \\ 54 \\ 55 \\ 30 \\ 29 \\ 35 \end{array} \right\}_{115}$                         | 96  |
| 012                                                                                                                                                                              | 0.34 | -    | 69                                                                                                                  | -   |
| $\left\{ \begin{array}{l} 3\bar{1}2 \\ 3\bar{2}2 \\ 3\bar{1}\bar{2} \\ 30\bar{2} \\ 112 \\ 11\bar{2} \\ 222 \\ 232 \\ 1\bar{2}\bar{2} \\ 322 \\ 132 \\ 332 \end{array} \right\}$ | 0.33 | 0.32 | $\left. \begin{array}{l} 16 \\ 28 \\ 27 \\ 42 \\ 5 \\ 3 \\ 34 \\ 9 \\ 4 \\ 33 \\ 4 \\ 22 \end{array} \right\}_{80}$ | 98  |
| $\bar{4}22$                                                                                                                                                                      | 0.29 | -    | 45                                                                                                                  | -   |
| $4\bar{1}2$                                                                                                                                                                      | 0.29 | -    | 44                                                                                                                  | -   |
| 302                                                                                                                                                                              | 0.29 | -    | 39                                                                                                                  | -   |
| 022                                                                                                                                                                              | 0.29 | -    | 28                                                                                                                  | -   |
| $31\bar{2}$                                                                                                                                                                      | 0.29 | -    | 27                                                                                                                  | -   |
| $40\bar{2}$                                                                                                                                                                      | 0.28 | -    | 32                                                                                                                  | -   |
| $432$                                                                                                                                                                            | 0.26 | -    | 36                                                                                                                  | -   |
| 402                                                                                                                                                                              | 0.26 | -    | 40                                                                                                                  | -   |
